# Supplementary material for: OSov: An Interactive Web Server to Evaluate Prognostic Biomarkers for Ovarian Cancer
Source: MDPI journal article supplement (doi:10.3390/biology11010023), 2021-12-24
Supplement: s1 [file s1]

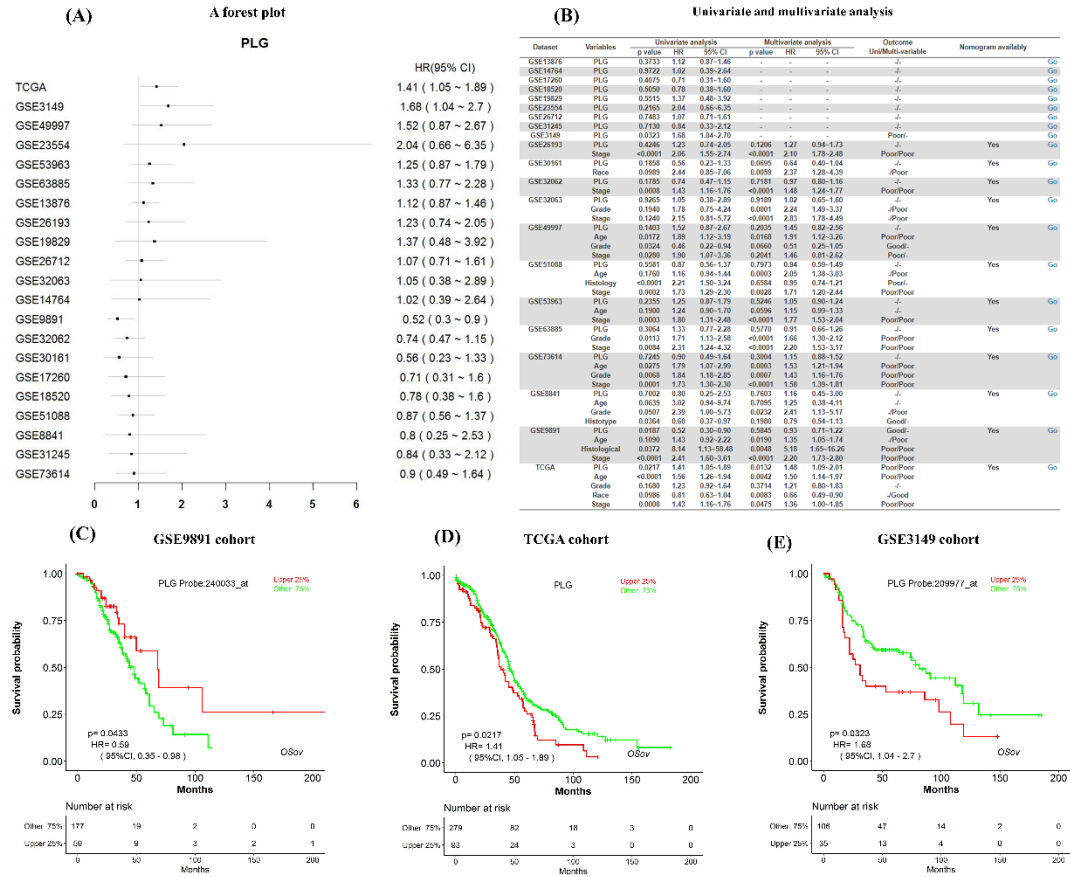

**Figure S1. OSov predicts overall survival for PLG gene for ovarian patients.** Previously reported that overexpression of PLG gene is associated with poor survival. (A) the forest analysis for CRYAB gene; (B) the univariate and multivariate analysis for CRYAB gene; (C) and (D) overexpression of PLG gene is a worse predictor in TCGA and GSE3149 cohorts, respectively; (E) a good prognostic biomarker in GSE9891 cohort for ovarian cancer. PLG: plasmin (ogen). Cutoff: upper 25% VS other 75%.
