# Supplementary material for: OSov: An Interactive Web Server to Evaluate Prognostic Biomarkers for Ovarian Cancer
Source: Biology (Basel). 2021 Dec 24;11(1):23. doi: 10.3390/biology11010023 (PMC8773055; doi:10.3390/biology11010023)
Supplement: Supplementary file 1 [file biology-11-00023-s001.zip › biology-1478768 sup final/OV-Table_S1.XLSX]

## Sheet: Table S1 
Previously reported prognostic biomarkers of ovarian cancer								Consistent/Contradiction of independent cohorts	P value/HR(95%CI)of survival in ovarian cancer cohorts by OSov
	Gene symbol	n	Expression associated with poor prognosis	Histology	Survival	Methods	Reference		Cutoff value	TCGA	GSE13876	GSE32062	GSE9891	GSE49997	GSE26712	GSE53963	GSE3149	GSE51088	GSE14764	GSE17260	GSE18520	GSE19829	GSE23554	GSE30161	GSE31245	GSE32063	GSE63885	GSE73614	GSE8841	GSE26193
1	ABCA1	55	Low	SC/EC/CC/MC	PFS/OS	IHC	Chou, Huang et al. 2015	1/0	Upper 25%							0.0115/1.60(1.11~2.30)
2	ADAM12	96	High	SC	OS/PFS	IHC	Cheon, Li et al. 2015	4/0	Upper 25%	0.0311/1.37(1.02~1.83)								0.0002/2.17(1.43~3.27)			0.0076/2.82(1.31~6.05)		0.0487/3.44(1.00~11.77)
3	ADAMTS1	28	High	SC/CC/EC/MC/other	OS	IHC	Lima, Dos Santos et al. 2016	2/0	Upper 25%															0.0344/2.20(1.06~4.59)				0.0229/1.91(1.09~3.33)
4	ADH1B	209	High		OS/PFS	qPCR	Gharpure, Lara et al. 2018	3/0	Upper 25%	0.0354/1.36(1.02~1.81)			0.0183/1.66(1.08~2.53)			0.0148/1.56(1.09~2.25)
5	AGR2	160	Low	SC/CC/EC/MC/other	DFS	IHC	Armes, Davies et al. 2013	4/0	Upper 25%				0.0038/0.39(0.21~0.74)				0.0051/0.39(0.20~0.75)	0.0154/0.55(0.34~0.89)				0.0307/0.10(0.01~0.80)
6	AGR3	159	Low	SC	OS	IHC	King, Tung et al. 2011	1/0	Upper 25%				0.0075/0.46(0.26~0.81)
7	AKT1	51	Low	SC/MC/other	OS/PFS	qPCR	Kim, Davidson et al. 2012	2/0	Upper 25%	0.0051/0.63(0.46~0.87)							0.0195/0.50(0.28~0.89)
8	ALDH5A1	131	Low	SC/CC/EC/MC/other	OS	IHC	Tian, Han et al. 2017	4/1	Upper 25%			0.0459/0.64(0.41~0.99)	0.0452/0.58(0.34~0.98)			0.0420/0.67(0.46~0.98)		0.0365/0.61(0.38~0.96)										0.0332/1.83(1.04~3.21)
9	ANXA10	118	High	SC	OS	IHC	Wang, Zhao et al. 2019	0/3	Upper 25%	0.0062/0.63(0.45~0.87)		0.0024/0.48(0.29~0.77)				0.0388/0.66(0.45~0.97)
10	ANXA8	81	High	HGSC/EC/MC/CCC	OS	IHC	Gou, Zhu et al. 2019	1/0	Upper 50%	0.0421/1.31(1.01~1.70)
11	ARL4C	61	High	CC/EC	OS/PFS	IHC	Wakinoue, Chano et al. 2019	2/0	Upper 25%									0.0002/2.20(1.45~3.34)										0.012/2.01(1.16~3.48)
12	ARMc8	247	High	SC/MC	OS	IHC	Jiang, Yang et al. 2015	1/0	Upper 25%							0.0172/1.53(1.07~2.18)
13	ASAH1	1106	Low	SC/EC/CC/MC/other	OS/PFS	IHC	El-Balat, Karn et al. 2020	1/0	Upper 50%																		0.0243/0.56(0.34~0.92)
14	ASAP1	95	High		OS/RFS	IHC	Hou, Yang et al. 2013	2/0	Upper 25%										0.0209/2.75(1.16~6.50)	0.0414/1.89(1.05~3.48)
15	AURKA	150	High		OS/DFS	IHC	Wang, Liu et al. 2015	1/0	Upper 25%									0.0328/1.56(1.03~2.37)
16	AXL	62	High	SC/MC	OS	IHC	Lozneanu, Pinciroli et al. 2016	3/0	Upper 25%				0.0002/2.21(1.45~3.38)			0.0060/1.65(1.15~2.36)		0.0388/1.54(1.02~2.34)
17	BECN1	141	Low	SC/other	PFS/OS	IHC	Minamoto, Nakayama et al. 2018	2/0	Lower 25%													0.0351/0.33(0.12~0.92)					0.0009/0.36(0.20~0.66)
18	BIRC2	128	High	SC/other	OS	IHC	Psyrri, Yu et al. 2006	2/0	Upper 25%		0.0482/1.28(1.00~1.65)												0.023/4.00(1.21~13.25)
19	BRCA1	292	High	SC/other	OS	IHC	Carser, Quinn et al. 2011	1/0	Upper 25%							0.0418/1.45(1.01~2.09)
20	BRCA2	150	High		OS/DFS	IHC	Wang, Liu et al. 2015	4/0	Upper 25%		0.0461/1.30(1.00~1.68)	0.0171/1.59(1.08~2.32)					0.0034/2.07(1.27~3.38)			0.038/1.89(1.03~3.46)
21	BRMS1L	124	Low	SC/CC/EC/MC	OS	IHC	Cao, Zhao et al. 2018	0/0	Upper 25%
22	BTN3A2	199	High	SC	OS/DFS	IHC	Le Page, Marineau et al. 2012	0/2	Upper 25%	0.0049/0.62(0.44~0.86)						0.0023/0.54(0.36~0.80)
23	CADM1	160	Low	SC/MC/other	OS	IHC	Yang, He et al. 2011	2/0	Upper 25%									0.0267/0.59(0.37~0.94)										0.0482/0.51(0.26~0.99)
24	CAPNS1	113	High	SC/CC/EC/MC	OS/PFS	IHC	Yang, Lou et al. 2018	2/0	Upper 50%		0.0387/1.27(1.01~1.59)					0.0247/1.44(1.04~1.98)
25	CDH1	51	Low	SC/MC/other	OS/PFS	qPCR	Kim, Davidson et al. 2012	1/0	Upper 25%									0.004/0.49(0.30~0.79)
26	CEP55	213	High	SC/CC/EC/MC	OS/DFS	IHC	Zhang, Niu et al. 2016	1/0	Lower 25%																			0.0197/2.33(1.14~4.76)
27	CHD1L	102	High	SC/MC/other	OS/PFS	IHC	He, Zhou et al. 2012	1/1	Upper 50%							0.0414/1.39(1.01~1.92)										0.0160/0.28(0.10~0.79)
28	CHEK1	259	High	SC/EC	OS/RFS	IHC	Ehlén, Nodin et al. 2011	2/0	Lower 25%		0.0464/1.26(1.00~1.58)																	0.0469/2.05(1.01~4.19)
29	CHEK2	259	High	SC/EC	OS/RFS	IHC	Ehlén, Nodin et al. 2011	1/2	Upper 25%											0.0037/2.74(1.38~5.42)		0.0362/0.32(0.11~ 0.92)					0.0252/0.50(0.27~0.91)
30	CHI3L1	180	High	SC/other	PFS/OS	IHC	Chiang, Lin et al. 2015	1/0	Upper 50%											0.0378/0.47(0.23~0.95)						0.0118/3.51(1.32~9.34)
31	CKS2	127	High	SC/CC/EC	OS	qPCR	Xu, Wang et al. 2019	1/0	Upper 25%		0.0083/1.40(1.09~1.80)
32	CLIC3	128	High	SC	OS	IHC	Dozynkiewicz, Jamieson et al. 2012	4/0	Upper 25%	0.0106/1.46(1.09~1.97)	0.0015/1.50(1.16~1.93)		0.0310/1.60(1.04~2.47)				0.0019/2.14(1.32~3.45)
33	CLU	86	High	SC/other	OS	IHC	Yang, Li et al. 2009	1/1	Upper 50%																	0.0262/2.94(1.13~7.64)	0.0197/0.55(0.33~0.91)
34	COL11A1	88	High	SC/other	OS/RFS	qPCR	Wu, Chang et al. 2014	6/0	Upper 25%		0.0005/1.56(1.21~2.01)		<0.0001/2.36(1.56~3.58)					0.0197/1.64(1.08~2.51)			0.0487/1.99(1.00~3.97)						0.0414/1.79(1.02~3.16)	0.0019/2.41(1.38~4.20)
35	COL3A1	206	High	HGSC/EC/MC/CCC	OS/DFS	IHC	Engqvist, Parris et al. 2019	5/0	Upper 25%		0.0349/1.31(1.01~1.69)	~	0.0096/1.75(1.14~2.67)	0.0178/1.92(1.11~3.30)				0.0139/1.68(1.11~2.54)										0.0016/2.60(1.43~4.73)
36	CRYAB	206	High	SC/CC/EC/MC/other	OS/DFS	IHC	Tan, Sha et al. 2019	7/0	Upper 25%		0.0021/1.48(1.15~1.91)		0.0086/1.76(1.15~2.69)	0.0249/1.87(1.08~3.23)			0.0004/2.36(1.46~3.80)			0.0187/2.11(1.13~3.95)						0.0323/2.89(1.09~7.65)			0.0037/4.82(1.66~13.95)
37	CTHRC1	88	High	SC/CC/EC/MC/other	OS	IHC	Hou, Cheng et al. 2015	4/0	Upper 25%		0.0025/1.47(1.14~1.90)		0.0061/1.80(1.18~2.74)	0.0014/2.37(1.39~4.01)										0.026/2.28(1.10~4.74)
38	CXCL12	44	High	SC/MC/CC/other	OS	IHC	Jiang, Wu et al. 2006	5/0	Upper 25%	0.0174/1.41(1.06~1.88)			0.0021/1.92(1.27~2.93)	0.0131/2.00(1.15~3.46)												0.0314/2.85(1.09~7.39)		0.0422/1.78(1.02~3.12)
39	CXCR4	44	High	SC/MC/CC/other	OS	IHC	Jiang, Wu et al. 2006	2/1	Upper 25%	0.0492/0.72(0.53~0.99)	0.0335/1.31(1.02~1.68)													0.0458/2.14(1.01~4.51)
40	CYP1B1	33	High	SC/CC/EC	OS	qPCR	Isaksson, Sorbe et al. 2014	1/0	Upper 50%					0.0413/1.76(1.02~3.03)			0.0372/0.51(0.27~0.96)
41	CYR61	167	High	SC/CC/EC/MC/other	OS	IHC	Shen, Cai et al. 2014	1/0	Upper 25%					0.0110/2.03(1.17~3.53)
42	DACH2	143	High	SC/other	OS	IHC	Nodin, Fridberg et al. 2012	0/1	Upper 50%	0.0437/0.76(0.58~ 0.99)
43	DDIT4	118	High	SC/CC/EC/MC	OS/DFS	IHC	Jia, Chang et al. 2014	1/0	Upper 50%																					0.0358/1.62(1.03~2.55)
44	DDR2	103	High	SC/other	OS/RFS	IHC	Fan, Xu et al. 2016	1/0	Upper 25%				0.0325/1.61(1.04~2.50)
45	DHFR	108	High		PFS	IHC	Wang, Hu et al. 2019	1/0	Upper 25%								0.0064/1.98(1.21~3.25)
46	DLK1	58	High	SC	OS/PFS	IHC	Huang, Cheng et al. 2019	0/4	Upper 25%				0.0375/0.55(0.32~0.96)											0.0499/0.38(0.14~0.99)		0.0118/0.14(0.03~0.65)		0.0381/0.45(0.21~0.95)
47	DMC1	160	Low		OS/DFS	IHC	Sun, Cao et al. 2019	1/0	Upper 25%	0.0378/0.72(0.53~0.98)
48	EDNRA	68	High	SC/other	OS	IHC	Rosano, Cianfrocca et al. 2014	3/0	Upper 25%		0.0017/1.50(1.16~1.93)		0.0238/1.64(1.06~2.52)	0.0094/2.05(1.19~3.53)
49	EN2	108	High	SC/EC/CC/MC/other	OS/PFS	IHC	McGrath, Annels et al. 2018	1/0	Upper 25%								0.0255/1.74(1.07~2.83)
50	EphB2	115	High	SC/other	OS	IHC	Wu, Suo et al. 2006	4/0	Upper 25%			0.0324/1.52(1.03~2.23)	0.0029/1.91(1.24~2.94)			0.0345/1.47(1.02~2.10)												0.0005/2.76(1.56~4.88)
51	EphB4	115	High	SC/other	OS	IHC	Wu, Suo et al. 2006	1/0	Upper 50%								0.0299/1.66（1.06~2.03）
52	FAP	338	High	SC/CC/EC/MC/	OS	IHC	Mhawech-Fauceglia, Yan et al. 2015	4/0	Upper 25%		0.0352/1.31(1.01~1.69)		0.0004/2.13(1.40~3.22)			0.0252/1.50(1.05~2.16)					0.0339/2.10(1.05~4.16)
53	FBN1	150	High		OS/DFS	IHC	Wang, Liu et al. 2015	3/0	Upper 25%	0.0187/1.40(1.05~1.87)			0.0370/1.58(1.02~2.43)	0.0009/2.46(1.44~4.19)
54	FGF1	91	High	SC/other	PFS	IHC	Smith, Ng et al. 2012	3/0	Upper 25%		0.0455/1.29(1.00~1.67)		<0.0001/2.52(1.65~3.84)															0.0009/2.49(1.45~4.27)
55	FILIP1L	182	Low	SC/CC/EC/MC/other	OS/DFS	IHC	Kwon, Kim et al. 2016	0/5	Upper 25%		0.0010/1.52(1.18~1.96)		0.0341/1.60(1.03~2.48)								0.0052/2.78(1.3563~5.70)				0.0112/2.88(1.27~6.53)			0.0064/2.24(1.25~4.00)
56	FKBP10	196	High		OS	IHC	Quinn, Wojnarowicz et al. 2013	1/0	Upper 25%									0.0104/1.87(1.15~3.03)
57	FLT1	73	High	SC/MC	OS/PFS	IHC	Wimberger, Chebouti et al. 2014	1/0	Upper 50%							0.0445/1.38(1.00~1.91)
58	FN1	108	High	SC/other	OS	IHC	Kujawa, Zembala-Nożyńska et al. 2020	5/0	Upper 25%	0.0334/1.36(1.02~1.82)			0.0085/1.77(1.15~2.71)	0.0351/1.81(1.04~3.15)		0.0407/1.46(1.01~2.10)
59	FOXA1	110	Low	SC/CC/EC/MC	OS	IHC	Wang, Guan et al. 2018	0/0	Upper 25%
60	FOXA2	79	Low		OS	IHC	Shang, Shi et al. 2021	2/0	Upper 25%											0.0489/0.45(0.21~0.99)								0.0134/0.40(0.19~0.82)
61	FOXM1	40	High	CC/EC(non-SC)	DSS	IHC	Tassi, Todeschini et al. 2017	1/0	Upper 25%																			0.0386/1.78(1.03~3.09)
62	FXYD5	68	High	HGSC	OS/PFS	IHC	Tassi, Gambino et al. 2019	3/0	Upper 25%								0.0028/2.14(1.29~3.53)	0.0001/2.29(1.49~3.51)								0.0091/3.62(1.37~9.55)
63	GOLPH3L	92	High	SC/CC/EC/MC/other	OS	IHC	Feng, He et al. 2015	1/0	Upper 25%																			0.018/1.90(1.11~3.23)
64	GPR158	206	High	HGSC/EC/MC/CCC	OS/DFS	IHC	Engqvist, Parris et al. 2019	1/0	Upper 25%																			0.0098/2.10(1.19~3.69)
65	GSTP1	57	High	SC/EC/CC/MC	OS	qPCR	Gao, Yang et al. 2019	1/1	Upper 50%									0.0365/0.66(0.45~0.97)								0.0259/2.16(1.09~4.27)
66	HCLS1	195	High	SC/CC/EC/MC	OS	IHC	Liu, Kajiyama et al. 2018	1/0	Lower 25%															0.0231/3.15(1.17~8.52)
67	HDGF	85	High	SC/other	OS	IHC	Liu, Liu et al. 2015	4/0	Lower 25%				0.0175/2.03(1.13~3.65)				0.0344(1.63(1.03~2.58)	0.0443/1.59(1.01~2.52)						0.0257/3.34(1.15~9.64)
68	HJURP	388	High	SC	OS	IHC	Li, Li et al. 2018	1/0	Upper 25%																			0.0058/2.24(1.26~3.98)
69	HMCN1	49	High	SC/CC	OS	IHC	Liu, Pan et al. 2019	1/1	Upper 50%							0.0163/1.47(1.07~2.03)										0.0426/0.37(0.14~0.96)
70	HMGB1	74	High	SC	OS/PFS	IHC	Paek, Lee et al. 2016	1/0	Upper 25%				0.0032/1.90(1.24~2.93)
71	HOXA4	90	High	SC	PFS	IHC	Miller, Patel et al. 2018	1/0	Upper 25%				0.0117/1.77(1.13~2.78)
72	HOXB3	90	High	SC	PFS	IHC	Miller, Patel et al. 2018	1/1	Lower 25%					0.0424/0.56(0.33~0.98)		0.0253/1.55(1.05~2.27)
73	ICAM1	103	High	SC	RFS/OS	IHC	Wang, Yin et al. 2019	2/0	Upper 25%									0.0027/1.89(1.24~2.87)								0.0028/4.18(1.63~10.73)
74	IGF2	115	High	SC/EC/MC/other	PFS	IHC	Huang, Brouwer-Visser et al. 2010	3/0	Upper 25%	0.0390/1.35(1.01~1.79)	<0.0001/1.93(1.50~2.48)					0.0150/1.56(1.09~2.24)
75	IGFBP7	79	Low	SC	OS	IHC	Gambaro, Quinn et al. 2015	1/0	Upper 50%							0.0088/1.53(1.11~2.11)
76	IRF1	7	Low	SC	OS/PFS	IHC	Cohen, Mosig et al. 2014	2/0	Upper 25%			0.0212/0.57(0.36~0.92)				0.0113/0.61(0.42~0.89)
77	ITGB1	129	High	SC	OS	IHC	Kanlikilicer, Rashed et al. 2016	6/0	Upper 25%	0.0050/1.52(1.13~2.04)	0.0119/1.38(1.07~1.78)			0.0158/1.95(1.1346~3.38)		0.0438/1.44(1.0104~2.07)	0.0198/1.78(1.0961~2.90)	0.0050/1.81(1.19~2.75)
78	KCNN4	127	High	SC	RFS	IHC	Zhao, Guo et al. 2016	1/0	Upper 50%					0.0085/2.07(1.20~ 3.57)
79	KDR	22	High	SC	OS	qPCR	Si, Zhang et al. 2019	2/0	Upper 25%													0.0464/3.03(1.01~9.05)							0.0173/3.48(1.24~9.76)
80	KIF20A	150	High	SC/CC/EC/MC	OS/DFS	IHC	Li, Zhang et al. 2018	1/0	Lower 25%				0.0422/1.80(1.02~3.18)
81	KISS1	40	Low	SC/other	OS	IHC	Cao, Chen et al. 2016	1/0	Upper 25%															0.009/0.27(0.10~0.72)
82	KLK10	182	High	SC/CC/EC/MC/other	OS/PFS	IHC	Luo, Katsaros et al. 2001	1/0	Upper 25%										0.0306/2.74(1.09~6.85)
83	KLK6	180	High	SC/CC/EC/MC/other	OS/PFS	IHC	Hoffman, Katsaros et al. 2002	1/0	Upper 50%												0.0456/0.46(0.21~0.98)					0.0233/2.91(1.15~7.34)
84	KLK7	150	High	SC/other	OS/DFS	IHC	Psyrri, Kountourakis et al. 2008	2/1	Upper 25%								0.021/1.77(1.00~2.87)					0.0424/0.21(0.04~0.94)						0.0241/1.85(1.08~3.17)
85	L1CAM	229	High	EC	DFS	IHC	Soovares, Pasanen et al. 2017	2/0	Upper 25%								0.0099/1.87(1.16~3.01)						0.0037/5.36(1.72~16.67)
86	LAMTOR5	120	High		OS	IHC	Wang, Sun et al. 2017	1/1	Upper 25%	0.0080/0.64(0.47~0.89)						0.0461/1.44(1.00~2.07)
87	LGALS1	156	High	SC/CC/EC/MC	OS	IHC	Schulz, Schmoeckel et al. 2017	3/0	Upper 25%		0.0025/1.47(1.14~1.90)			0.0404/1.76(1.02~3.05)							0.0302/2.16(1.07~4.33)
88	LGR5	210	High	SC/EC/CC/MC	OS	IHC	Yu, Mao et al. 2019	0/1	Upper 25%			0.0341/0.25(0.07~0.90)
89	LOX	70	High	SC	OS/PFS	IHC	De Donato, Petrillo et al. 2017	3/0	Upper 25%		0.0085/1.40(1.09~1.80)		0.0028/1.88(1.24~2.86)					0.0048/1.82(1.20~2.78)
90	LPAR1	44	High		OS/PFS	qPCR	Onallah, Catane et al. 2018	1/0	Upper 25%							0.0025/1.76(1.22~2.54)
91	LPAR5	44	High		OS/PFS	qPCR	Onallah, Catane et al. 2018	1/0	Upper 50%																					0.0330/1.64(1.04~2.60)
92	MAP2K1	34	High		OS/RFS	IHC	Pénzváltó, Lánczky et al. 2014	0/1	Upper 25%															0.0397/0.37(0.14~0.95)
93	MCAM	611	High	SC	OS	IHC	Onisim, Vlad et al. 2019	1/0	Lower 25%				0.0327/1.85(1.05~3.28)
94	MCM3	259	High	SC/EC	OS/RFS	IHC	Ehlén, Nodin et al. 2011	1/1	Upper 50%	0.0091/0.70(0.54~0.91)																		0.0312/1.79(1.05~3.04)
95	MELK	22	Low	SC	OS	qPCR	Si, Zhang et al. 2019	1/0	Lower 25%							0.0229/0.66(0.46~0.94)												0.0064/2.15(1.24~3.74)	0.0251/3.20(1.15~8.87)
96	METTL3	162	High	SC/MC/other	OS	IHC	Hua, Zhao et al. 2018	2/0	Upper 25%		0.0040/1.45(1.12~1.87)		0.0185/1.68(1.09~2.60)
97	MLH1	28	High	SC	OS/PFS	IHC	Kawashima, Yoshida et al. 2019	0/2	Upper 25%								0.0006/0.31(0.16~0.61)		0.0398/0.12(0.01~0.90)
98	MMP2	100	High	SC	OS	IHC	Perigny, Bairati et al. 2008	3/0	Upper 25%					0.0356/1.79(1.04~3.09)		0.0465/1.44(1.00~2.07)		0.0099/1.72(1.14~2.61)
99	MTDH	73	High	SC/MC/other	OS	IHC	Zhou, Yang et al. 2015	1/0	Upper 25%											0.0088/2.22(1.22~4.06)
100	MTSS1	33	Low	SC/CC/EC	OS	qPCR	Isaksson, Sorbe et al. 2014	0/2	Upper 25%													0.0049/4.92(1.62~14.97)					0.008/2.13(1.21~3.75)
101	MUC16	204	High	SC/EC/CC/MC/other	OS	IHC	Liang, Wu et al. 2019	2/0	Upper 25%		0.0327/1.31(1.02~1.70)						0.007/1.92(1.19~3.08)
102	MVP	57	High	SC/EC/CC/MC	OS	qPCR	Gao, Yang et al. 2019	2/0	Upper 25%					0.0178/1.95(1.12~3.41)			0.0167/1.81(1.11~2.96)
103	NCALD	33	Low	SC/CC/EC	OS	qPCR	Isaksson, Sorbe et al. 2014	1/0	Upper 25%				0.0052/0.44(0.25~0.78)
104	NEDD9	129	High	SC/other	OS/PFS	IHC	Wang, Mu et al. 2014	1/0	Upper 25%														0.0407/4.06(1.06~15.55)
105	NME1	77	High	SC	OS	IHC	Youn, Kim et al. 2008	1/1	Upper 50%	0.0466/0.76(0.59~0.99)		0.0394/1.46(1.01~2.09)
106	NOP14	33	Low	SC/CC/EC	OS	qPCR	Isaksson, Sorbe et al. 2014	0/1	Upper 50%															0.0476/1.98（1.01~3.88）
107	PARP1	174	High		OS/PFS	IHC	Gan, Green et al. 2013	3/0	Upper 25%		0.0154/1.36(1.06~1.75)								0.0208/2.898(1.17~7.14)									0.0029/2.23(1.31~3.78)
108	PDGFRB	45	High		OS	IHC	Dabrow, Francesco et al. 1998	5/0	Upper 25%	0.0202/1.39(1.05~1.85)			0.0033/1.85(1.22~2.80)	0.0040/2.19(1.28~3.75)				0.0201/1.63(1.08~2.47)			0.0165/2.3(1.17~4.87)
109	PGF	89	High	SC	OS	IHC	Meng, Duan et al. 2018	2/0	Upper 25%													0.0008/9.34(2.51~34.67)							0.0328/3.13(1.09~8.96)
110	PIK3CA	62	Low	SC/CC/EC/MC/other	OS	IHC	Abe, Minaguchi et al. 2013	0/1	Upper 25%																			0.0288/1.89(1.06~3.35)
111	PITHD1	206	Low	HGSC/EC/MC/CCC	OS/DFS	IHC	Engqvist, Parris et al. 2019	1/0	Upper 25%			0.0037/1.77(1.20~2.60)
112	PKP3	157	High	SC/other	OS	IHC	Qian, Yuan et al. 2019	1/0	Upper 25%																		0.0072/2.18(1.23~3.87)
113	PLG	103	Low	SC	OS	IHC	Zhao, Dorn et al. 2017	2/0	Upper 50%				0.0025/0.52(0.35~0.79)											0.0270/0.46(0.23~ 0.91)
114	POSTN	138	High	SC/EC	OS	IHC	Ryner, Guan et al. 2015	5/0	Upper 25%		0.0016/1.50(1.16~1.93)		0.0028/1.89(1.24~2.88)			0.0067/1.64(1.14~2.35)		0.0352/1.55(1.03~2.35)										0.0356/1.84(1.04~3.28)
115	PRDX1	55	High	SC/EC/CC/MC	OS/DFS	IHC	Sienko, Teliga-Czajkowska et al. 2019	1/2	Upper 25%					0.0311/0.45(0.22~0.93)		0.0013/0.53(0.36~0.78)	0.0473/0.55(0.31~0.99)
116	PTK2	51	Low	SC/MC/other	OS/PFS	qPCR	Kim, Davidson et al. 2012	0/1	Upper 25%																			0.0393/1.8(1.03~3.38)
117	PXDN	16	High		OS	qPCR	Zheng and Liang 2018	5/0	Upper 25%	0.0425/1.36(1.01~1.84)						<0.0001/2.11(1.46~3.06)	0.0015/2.15(1.34~3.44)							0.0214/2.31(1.13~4.74)				0.0328/1.84(1.05~3.22)
118	RCAN1	50	High	SC	OS	IHC	Xin, Ji et al. 2019	2/0	Upper 25%								0.0278/1.75(1.06~2.89)									0.0413/2.52(1.03~6.13)
119	RECQL	160	High		OS/DFS	IHC	Sun, Cao et al. 2019	5/0	Upper 25%	0.0022/1.61(1.18~2.19)	0.0131/1.37(1.06~1.77)	0.0346/1.52(1.03~2.24)								0.0019/2.81(1.46~5.39)							0.0349/1.81(1.04~3.16)
120	RPSA	62	High	SC/other	PFS	IHC	Song, Choi et al. 2012	0/1	Upper 50%							0.0301/0.70(0.50~0.96)
121	SENP3	124	High	SC/CC/EC/MC/other	OS	IHC	Cheng, Su et al. 2017	2/1	Upper 25%								0.0411/1.66(1.02~2.70)			0.0468/1.87(1.00~3.50)				0.0275/0.36(0.14~0.89)
122	Siah2	122	High		OS/DFS	IHC	Gao, Liu et al. 2016	1/0	Upper 25%		0.0285/1.32(1.03~1.70)
123	SIK3	204	Low	SC/EC/CC/MC/other	OS	IHC	Liang, Wu et al. 2019	1/0	Upper 50%									0.0368/0.37(0.15~0.94)
124	SNAI2	150	High		OS/DFS	IHC	Wang, Liu et al. 2015	2/0	Upper 25%	0.0266/1.38(1.03~1.85)								0.0010/2.00(1.32~3.03)
125	SOD2	61	High	CC/EC	OS	IHC	Amano, Chano et al. 2019	1/1	Upper 25%			0.0461/0.61(0.38~0.99)										0.0108/4.09(1.38~12.11)
126	Sox11	68	Low	SC/CC/EC/MC/other	RFS	IHC	Brennan, Ek et al. 2009	0/4	Upper 25%				<0.0001/2.40(1.57~3.66)				0.0346/1.70(1.03~2.79)	0.013/1.69(1.11~2.55)			0.0104/2.44(1.23~4.84)
127	SOX30	220	Low	SC/MC	OS	IHC	Han, Liu et al. 2019	0/0	Upper 25%
128	SPAG5	102	High	SC/CC/EC/MC	OS/DFS	IHC	Zhang, Sha et al. 2020	5/0	Upper 25%			0.0367/1.50(1.02~2.21)					0.0288/1.70(1.05~2.74)	0.0455/1.53(1.00~2.32)		0.0147/2.11(1.15~3.85)								0.0342/1.86(1.04~3.30)
129	SPATA2	170	High	SC/CC/EC/MC	OS/PFS	qPCR	Wieser, Tsibulak et al. 2019	4/0	Upper 25%		0.0118/1.38(1.07~1.78)	0.0274/1.54(1.04~2.27)					0.0446/1.65(1.01~2.70)			0.0021/2.77(1.44~5.31)
130	SPINK13	24	Low	SC/CC/EC/MC	OS	IHC	Cai, Zhang et al. 2018	2/0	Upper 25%	0.0292/0.70(0.51~0.96)																		0.0031/0.27(0.12~0.65)
131	Spry2	99	Low	SC/CC/EC/MC/other	OS/DFS	IHC	Masoumi-Moghaddam, Amini et al. 2015	2/1	Upper 25%				0.0074/0.47(0.27~0.81)													0.0231/0.09(0.01~0.72)			0.0108/3.95(1.37~11.37)
132	SQSTM1	266	High	SC/CC/EC/MC	OS	IHC	Iwadate, Inoue et al. 2014	0/0	Upper 25%
133	SRA1	111	High	SC/MC/other	OS/PFS	IHC	Leoutsakou, Talieri et al. 2006	2/0	Upper 25%												0.0316/2.12(1.06~4.21)					0.0248/3.15(1.15~8.62)
134	SRPX	49	High	SC/CC	OS	IHC	Liu, Pan et al. 2019	4/0	Upper 25%			0.0134/1.64(1.10~2.42)				0.0217/1.53(1.06~2.21)		0.0212/1.63(1.07~2.48)			0.0422/2.05(1.02~4.09)
135	STAT1	65	High	SC	OS/DFS	IHC	Josahkian, Saggioro et al. 2018	1/1	Upper 25%	0.0156/0.67(0.49~0.92)																		0.008/2.2207(1.23~4.00)
136	STIP1	330	High	SC/CC/EC/MC/other	OS	IHC	Chao, Lai et al. 2013	1/0	Upper 25%																		0.0056/2.22(1.26~3.92)
137	STOML2	130	High		OS	qPCR	Zhang, Song et al. 2019	0/2	Upper 50%				0.0220/0.61(0.40~0.93)			0.0092/0.65(0.47~0.90)
138	STON2	99	High	SC/CC/EC/MC	OS/DFS	IHC	Sun, Zhang et al. 2017	2/0	Upper 50%				0.0165/1.64(1.09~2.47)															0.0282/1.82(1.06~3.11)
139	SYF2	119	High	SC/CC/EC/MC/other	OS	IHC	Yan, Deng et al. 2015	3/0	Upper 25%			0.0480/1.48(1.00~2.19)				<0.0001/2.20(1.53~3.15)	0.0038/2.00(1.25~3.19)
140	TACSTD2	128	High	SC/CC/EC/MC/other	OS/DFS	IHC	Xu, Zhang et al. 2016	1/0	Lower 25%								0.0332/1.69(1.04~2.76)
141	TBC1D16	156	Low	SC/MC/other	OS	IHC	Yang, Shen et al. 2018	1/0	Upper 25%																			0.0271/0.54(0.31~0.93)
142	TCF4	188	Low	SC/CC/EC/MC	OS/DFS	IHC	Liu, Zeng et al. 2019	1/1	Upper 25%									0.0094/1.73(1.14~2.62)										0.0316/0.48(0.24~0.93)
143	THBS1	29	High		OS	IHC	Kodama, Hashimoto et al. 2001	5/0	Upper 25%		0.0201/1.35( 1.04~1.74)		0.0137/1.70(1.11~2.59)	0.0484/1.74(1.00~3.03)				0.0427/1.53(1.01~2.32)							0.011/2.87(1.27~6.5)
144	THBS2	29	High		OS	IHC	Kodama, Hashimoto et al. 2001	2/0	Upper 25%				0.0005/2.10(1.38~3.19)			0.0367/1.46(1.02~2.10)
145	TIMP3	138	High	SC/EC	OS	IHC	Ryner, Guan et al. 2015	5/0	Upper 25%	<0.0001/1.79(1.33~2.39)			<0.0001/2.67(1.76~4.07)	0.0217/1.89(1.09~3.27)				0.0183/1.64(1.08~2.49)										0.0161/1.98(1.13~3.46)
146	TK1	109	High	SC	OS	IHC	Wang, Liu et al. 2017	1/0	Lower 25%																			0.0007/4.35(1.86~10.18)
147	TNFAIP8	202	High	SC/CC/EC/MC	OS/DFS	IHC	Liu, Gao et al. 2013	1/0	Upper 50%																			0.0469/1.73(1.00~2.99)
148	TNFRSF4	44	Low		OS	IHC	Ramser, Eichelberger et al. 2018	1/0	Upper 25%				0.0466/0.60(0.36~0.99)
149	TOR2A	57	High	SC/CC/EC/MC	OS	IHC	Zhang, Chen et al. 2017	0/0	Upper 25%
150	TRAP1	265	High	SC/CC/EC/MC/other	OS	IHC	Lv, Sun et al. 2016	1/1	Lower 25%	0.0314/1.39(1.03~1.88)																	0.0066/0.46(0.26~0.80)
151	TSLP	144	High	SC/CC/EC/other	OS/DFS	qPCR	Xu, Guo et al. 2019	0/0	Upper 25%
152	TXN	187	Low	SC/CC/EC/MC/other	OS/PFS	qPCR	Pontikakis, Papadaki et al. 2017	2/0	Upper 25%				0.0225/0.51(0.29~0.91)					0.0219/0.57(0.35~0.92)
153	USP17L2	73	High	SC/MC/other	OS	IHC	Zhou, Shu et al. 2015	0/0	Upper 25%
154	VASH1	210	High	SC/EC/CC/MC	OS	IHC	Yu, Mao et al. 2019	2/0	Upper 25%					0.0051/2.14(1.25~3.66)									0.0463/3.12(1.01~9.55)
155	VGLL3	180	Low		DFI	IHC	Gambaro, Quinn et al. 2013	0/2	Upper 25%				0.0031/1.88(1.23~2.86)					0.0127/1.69(1.11~2.56)
156	WFDC2	94	High	SC/ MC/other	OS/PFS	IHC	Luo, Zhao et al. 2018	0/1	Upper 50%																				0.0167/0.20(0.05~ 0.75)
157	WNT5A	38	High	SC/CC/EC/MC/other	OS	IHC	Badiglian Filho, Oshima et al. 2009	2/1	Upper 25%		0.0103/1.39(1.08~1.80)					0.0393/1.45(1.01~2.08)										0.0202/0.17(0.04~0.76)
158	WRAP53	151	Low	SC/CC/EC/MC/other	OS	IHC	Hedström, Pederiva et al. 2015	0/1	Upper 50%										0.0410/0.37(0.14~0.96)								0.0091/1.95(1.18~3.23)
159	WT1	196	High	SC/CC/EC/MC	OS	IHC	Carter, Deddens et al. 2018	1/0	Upper 25%																			0.0002/2.74(1.60~4.71)
160	WWOX	210	Low	SC/EC/CC/MC	OS	IHC	Yu, Mao et al. 2019	2/0	Lower25%	0.0433/0.74(0.55~0.99)									0.0410/0.37(0.14~0.96)
161	XPC	160	High		OS/DFS	IHC	Sun, Cao et al. 2019	1/1	Upper 25%				0.0102/0.46(0.25~0.83)									0.0473/2.91(1.01~8.39)
162	YWHAZ	88	High	SC	OS/DFS	IHC	Kim, Sung et al. 2018	2/0	Upper 25%		0.0419/1.30(1.00~1.68)																	0.035/1.85(1.04~3.28)
163	ZEB2	43	High	SC	OS/PFS	IHC	Yoshihara, Tajima et al. 2009	2/0	Upper 25%									0.0342/1.57(1.03~2.40)			0.0268/2.29(1.10~4.78)
